# Supplementary material for: Physician-Level Cost Control Measures and Regional Variation of Biosimilar Utilization in Germany
Source: PubMed Central journal article supplement (PMC7313006; doi:10.3390/ijerph17114113), 2020-06-09
Supplement: ijerph-17-04113-s001.pdf [file ijerph-17-04113-s001.pdf]

## Supplementary Material

**Supplementary Table 1:** Identification of drug agreements for biosimilar prescribing, web search and contact with physician associations.

| Physician association         | URL, last access 14.05.2018                                                                                                                                                                                        | Drug agreements (web search)                       | Date contacted | Drug agreements (material obtained and date responded) |
|-------------------------------|--------------------------------------------------------------------------------------------------------------------------------------------------------------------------------------------------------------------|----------------------------------------------------|----------------|--------------------------------------------------------|
| Baden-Wuerttemberg            | <a href="https://www.kvbawue.de/praxis/service/formulare-antraege-merkblaetter/">https://www.kvbawue.de/praxis/service/formulare-antraege-merkblaetter/</a>                                                        | 2013-2017                                          | 15.05.2018     | 04.06.2018: 2008-2012                                  |
| Bavaria                       | <a href="https://www.kvb.de/verordnungen/arzneimittel/richtliniengesetze/">https://www.kvb.de/verordnungen/arzneimittel/richtliniengesetze/</a>                                                                    | 2013-2018                                          | 15.05.2018     | 18.06.2018: 2008-2011                                  |
| Berlin                        | <a href="https://www.kvberlin.de/20praxis/60vertrag/10vertraege/arznei_und_heilmittel/index.html">https://www.kvberlin.de/20praxis/60vertrag/10vertraege/arznei_und_heilmittel/index.html</a>                      | complete                                           | No inquiry     |                                                        |
| Brandenburg                   | <a href="https://www.kvbb.de/praxis/verordnungen/arzneimittel/">https://www.kvbb.de/praxis/verordnungen/arzneimittel/</a>                                                                                          | 2010-2018                                          | 15.05.2018     | No response                                            |
| Bremen                        | <a href="https://www.kvhb.de/arzneimittel-richtgr%C3%B6%C3%9Fen">https://www.kvhb.de/arzneimittel-richtgr%C3%B6%C3%9Fen</a>                                                                                        | 2014-2018                                          | 15.05.2018     | 27.06.2018: 2008-2013                                  |
| Hamburg                       | <a href="http://www.kvhh.net/kvhh/pages/index/p/177/0/g_id/428">http://www.kvhh.net/kvhh/pages/index/p/177/0/g_id/428</a>                                                                                          | 2012-2017                                          | 15.05.2018     | 24.05.2018: 2008-2011                                  |
| Hesse                         | <a href="https://www.kvhessen.de/fuer-unsere-mitglieder/recht-und-vertrag/land/arzneimittel-vereinbarung/">https://www.kvhessen.de/fuer-unsere-mitglieder/recht-und-vertrag/land/arzneimittel-vereinbarung/</a>    | 2012-2018                                          | 15.05.2018     | No response                                            |
| Mecklenburg-Western Pomerania | <a href="http://www.kvmv.info/aerzte/22/01_Arzneimittel/Regionale_Vereinbarungen/index.html">http://www.kvmv.info/aerzte/22/01_Arzneimittel/Regionale_Vereinbarungen/index.html</a>                                | -                                                  | 15.05.2018     | No response                                            |
| Lower Saxony                  | <a href="http://www.kvn.de/Ueber-uns/Amtliche-Bekanntmachungen/">http://www.kvn.de/Ueber-uns/Amtliche-Bekanntmachungen/</a>                                                                                        | Agreements available, but no biosimilar regulation | 15.05.2018     | 01.06.2018                                             |
| North Rhine                   | <a href="https://www.kvno.de/10praxis/40verordnungen/10arzneimittel/a_z/index.html">https://www.kvno.de/10praxis/40verordnungen/10arzneimittel/a_z/index.html</a>                                                  | 2011-2018                                          | 15.05.2018     | 15.05.2018: 2008-2010                                  |
| Rhineland-Palatinate          | <a href="https://www.kv-rlp.de/mitglieder/vertraege/arzneimittel/">https://www.kv-rlp.de/mitglieder/vertraege/arzneimittel/</a>                                                                                    | 2016-2018                                          | 15.05.2018     | 30.05.2018: 2008-2015                                  |
| Saarland                      | <a href="https://www.kvsaarland.de/vertraege-der-kvs">https://www.kvsaarland.de/vertraege-der-kvs</a>                                                                                                              | complete                                           | No inquiry     |                                                        |
| Saxony                        | <a href="https://www.kvs-sachsen.de/mitglieder/vertraege/">https://www.kvs-sachsen.de/mitglieder/vertraege/</a>                                                                                                    | 2013-2018                                          | 15.05.2018     | 25.05.2018: 2008-2012                                  |
| Saxony-Anhalt                 | <a href="https://www.kvsa.de/praxis/verordnungsmanagement/arzneimittel/arzneimittelvereinbarung.html">https://www.kvsa.de/praxis/verordnungsmanagement/arzneimittel/arzneimittelvereinbarung.html</a>              | 2018                                               | 15.05.2018     | 18.07.2018: 2008-2017                                  |
| Schleswig-Holstein            | <a href="https://www.kvsh.de/KVSH/index.php?StoryID=299&amp;kat=7&amp;search=">https://www.kvsh.de/KVSH/index.php?StoryID=299&amp;kat=7&amp;search=</a><br><a href="https://www.kvsh.de/">https://www.kvsh.de/</a> | complete                                           | No inquiry     |                                                        |
| Thuringia                     | <a href="https://www.kv-thueringen.de/mitglieder/vertraege/a/arzneimittelvereinbarung/index.html">https://www.kv-thueringen.de/mitglieder/vertraege/a/arzneimittelvereinbarung/index.html</a>                      | complete                                           | No inquiry     |                                                        |

Westphalia-Lippe

[https://www.kvwl.de/arzt/recht/kvwl/amv\\_hmv/index.htm](https://www.kvwl.de/arzt/recht/kvwl/amv_hmv/index.htm)

complete

No inquiry

---

**Supplementary Table 2:** Number of physician practices with biologic prescriptions 2013.

| <b>Physician association</b>  | <b>ESA</b>   | <b>Filgrastim</b> | <b>Somatropin</b> |
|-------------------------------|--------------|-------------------|-------------------|
| Schleswig-Holstein            | 378          | 127               | 58                |
| Hamburg                       | 194          | 73                | 38                |
| Bremen                        | 67           | 21                | 28                |
| Lower Saxony                  | 962          | 284               | 206               |
| Westphalia-Lippe              | 823          | 208               | 173               |
| North Rhine                   | 938          | 196               | 161               |
| Hesse                         | 608          | 126               | 107               |
| Rhineland-Palatinate          | 469          | 137               | 72                |
| Baden-Wuerttemberg            | 1,471        | 569               | 275               |
| Bavaria                       | 1,507        | 522               | 261               |
| Berlin                        | 298          | 134               | 34                |
| Saarland                      | 147          | 31                | 17                |
| Mecklenburg-Western Pomerania | 295          | 107               | 50                |
| Brandenburg                   | 312          | 65                | 30                |
| Saxony-Anhalt                 | 385          | 133               | 27                |
| Thuringia                     | 279          | 125               | 20                |
| Saxony                        | 439          | 189               | 48                |
| <b>Total</b>                  | <b>9,572</b> | <b>3,047</b>      | <b>1,605</b>      |

**Supplementary Table 3:** Cost-control measures for biosimilars by physician associations, 2009-2015, ESA.

| Physician association          | 2009 | 2010 | 2011 | 2012 | 2013 | 2014 | 2015 |
|--------------------------------|------|------|------|------|------|------|------|
| Bavaria                        | 2    | 0    | 0    | 0    | 1    | 2    | 2    |
| Bremen                         | 0    | 0    | 0    | 1    | 1    | 2    | 2    |
| Hesse*                         | 0    | 0    | 0    | 2    | 2    | 2    | 0    |
| Rhineland-Palatinate           | 2    | 2    | 2    | 2    | 2    | 2    | 2    |
| Schleswig-Holstein             | 2    | 2    | 2    | 2    | 2    | 1    | 0    |
| Baden-Wuerttemberg             | 0    | 0    | 0    | 0    | 0    | 0    | 0    |
| Berlin                         | 2    | 0    | 2    | 2    | 2    | 2    | 2    |
| Brandenburg*                   | 0    | 2    | 2    | 2    | 2    | 2    | 2    |
| Lower Saxony                   | 0    | 0    | 0    | 0    | 0    | 0    | 2    |
| North Rhine                    | 2    | 2    | 2    | 2    | 2    | 2    | 2    |
| Saxony                         | 0    | 2    | 2    | 0    | 0    | 0    | 0    |
| Westphalia-Lippe               | 2    | 2    | 2    | 2    | 2    | 2    | 2    |
| Hamburg                        | 0    | 0    | 2    | 2    | 2    | 2    | 2    |
| Saarland                       | 0    | 2    | 2    | 2    | 2    | 2    | 2    |
| Saxony-Anhalt                  | 0    | 0    | 2    | 2    | 2    | 2    | 2    |
| Thuringia                      | 0    | 1    | 1    | 1    | 0    | 0    | 0    |
| Mecklenburg-Western Pomerania* | 0    | 0    | 0    | 0    | 0    | 0    | 0    |

\* No complete data on cost-control measures available and therefore excluded from analysis, 0: no measure, 1: priority prescribing, 2: biosimilar quota.

**Supplementary Table 4.** Cost-control measures for biosimilars by physician associations, 2009-2015, filgrastim.

| Physician association          | 2009 | 2010 | 2011 | 2012 | 2013 | 2014 | 2015 |
|--------------------------------|------|------|------|------|------|------|------|
| Bavaria                        | 0    | 0    | 0    | 0    | 1    | 1    | 1    |
| Bremen                         | 0    | 0    | 0    | 1    | 1    | 2    | 2    |
| Hesse*                         | 0    | 0    | 0    | 0    | 2    | 2    | 0    |
| Rhineland-Palatinate           | 0    | 0    | 0    | 0    | 0    | 1    | 1    |
| Schleswig-Holstein             | 0    | 0    | 2    | 2    | 2    | 1    | 0    |
| Baden-Wuerttemberg             | 0    | 0    | 0    | 0    | 0    | 0    | 0    |
| Berlin                         | 0    | 0    | 0    | 0    | 0    | 0    | 0    |
| Brandenburg*                   | 0    | 0    | 0    | 0    | 0    | 0    | 0    |
| Lower Saxony                   | 0    | 0    | 0    | 0    | 0    | 0    | 1    |
| North Rhine                    | 0    | 0    | 0    | 0    | 0    | 0    | 1    |
| Saxony                         | 0    | 0    | 0    | 0    | 0    | 0    | 0    |
| Westphalia-Lippe               | 0    | 0    | 0    | 1    | 1    | 1    | 1    |
| Hamburg                        | 0    | 0    | 0    | 0    | 0    | 0    | 0    |
| Saarland                       | 0    | 0    | 0    | 0    | 0    | 0    | 1    |
| Saxony-Anhalt                  | 0    | 0    | 0    | 0    | 0    | 0    | 0    |
| Thuringia                      | 0    | 0    | 0    | 0    | 0    | 0    | 0    |
| Mecklenburg-Western Pomerania* | 0    | 0    | 0    | 0    | 0    | 0    | 0    |

\* No complete data on cost-control measures available and therefore excluded from analysis, 0: no measure, 1: priority prescribing, 2: biosimilar quota.

**Supplementary Table 5.** Cost-control measures for biosimilars by physician associations, 2009-2015, somatropin.

| Physician association          | 2009 | 2010 | 2011 | 2012 | 2013 | 2014 | 2015 |
|--------------------------------|------|------|------|------|------|------|------|
| Bavaria                        | 0    | 0    | 0    | 0    | 1    | 1    | 2    |
| Bremen                         | 0    | 0    | 0    | 1    | 1    | 2    | 2    |
| Hesse*                         | 0    | 0    | 0    | 0    | 2    | 0    | 0    |
| Rhineland-Palatinate           | 0    | 1    | 1    | 1    | 1    | 1    | 1    |
| Schleswig-Holstein             | 0    | 0    | 0    | 0    | 0    | 1    | 0    |
| Baden-Wuerttemberg             | 0    | 0    | 0    | 0    | 0    | 0    | 0    |
| Berlin                         | 0    | 0    | 0    | 0    | 0    | 0    | 0    |
| Brandenburg*                   | 0    | 0    | 0    | 0    | 0    | 0    | 0    |
| Lower Saxony                   | 0    | 0    | 0    | 0    | 0    | 0    | 1    |
| North Rhine                    | 0    | 2    | 0    | 0    | 0    | 0    | 1    |
| Saxony                         | 0    | 0    | 0    | 0    | 0    | 0    | 0    |
| Westphalia-Lippe               | 0    | 0    | 0    | 1    | 1    | 2    | 2    |
| Hamburg                        | 0    | 0    | 0    | 0    | 0    | 0    | 0    |
| Saarland                       | 0    | 2    | 0    | 0    | 0    | 0    | 1    |
| Saxony-Anhalt                  | 0    | 0    | 0    | 0    | 0    | 0    | 0    |
| Thuringia                      | 0    | 1    | 0    | 0    | 0    | 0    | 0    |
| Mecklenburg-Western Pomerania* | 0    | 0    | 0    | 0    | 0    | 0    | 0    |

\* No complete data on cost-control measures available and therefore excluded from analysis, 0: no measure, 1: priority prescribing, 2: biosimilar quota
